# Supplementary material for: All-in-one HN@Cu-MOF nanoparticles with enhanced reactive oxygen species generation and GSH depletion for effective tumor treatment
Source: Royal Society of Chemistry journal article supplement (doi:10.1039/d3tb02433d), 2023-01-01
Supplement: d3tb02433d1.pdf [file d3tb02433d1.pdf]

## Supporting Information

### **All-in-One HN@Cu-MOF nanoparticle with Enhanced Reactive Oxygen Species Generation and GSH Depletion for Effective Tumor Treatment**

Shuhui Chen<sup>1, #</sup>, Yu Yan<sup>1, #</sup>, Yixuan Chen<sup>1</sup>, Kaili Wang<sup>1</sup>, Yawen Zhang<sup>1</sup>, Xinlong Wang<sup>1</sup>, Xurui Li<sup>1</sup>, Jian Wen<sup>2, \*</sup>, Yue Yuan<sup>1, \*</sup>

1. School of Pharmacy, Shenyang Key Laboratory of Functional Drug Carrier Materials, Shenyang Pharmaceutical University, 103 Wenhua Road, Shenyang, 110016, P. R. China

2. Department of Breast Surgery, The Fourth Affiliated Hospital of China Medical University, No.4 Chongshan East Road, Shenyang, Liaoning, 110032, P. R. China

\*Corresponding author:

Yue Yuan, PhD

E-mail: [hiyueyuan@163.com](mailto:hiyueyuan@163.com)

Tel: +86-24-43520585

Jian Wen, PhD

E-mail: [wenjian@cmu.edu.cn](mailto:wenjian@cmu.edu.cn)

Tel: +86-24-62043436

# Shuhui Chen and Yu Yan contribute equally to this work.

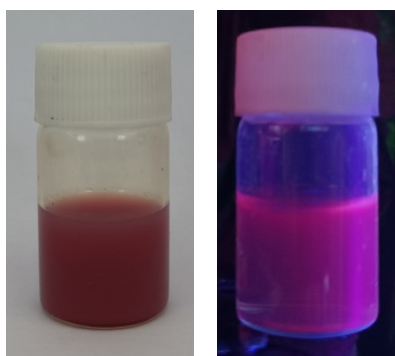

Fig. S1. HN@Cu-MOF dispersed in water under (left) ambient light and (right) UV irradiation ( $\lambda = 365$  nm).

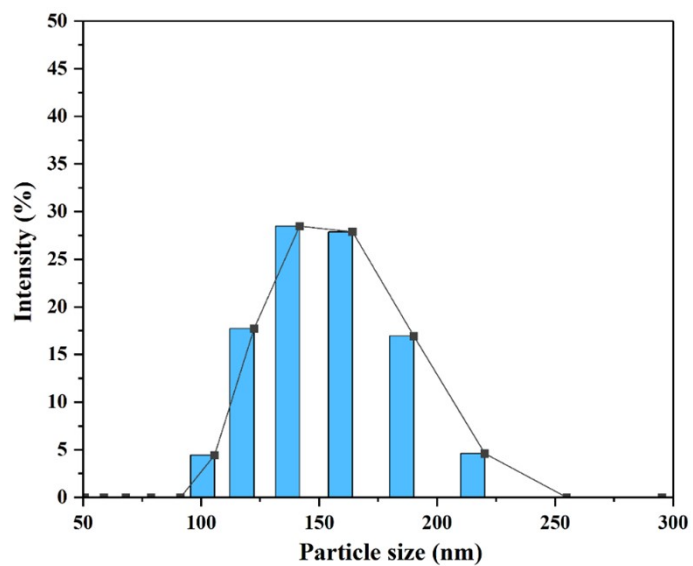

Fig. S2. The particle size of HN@Cu-MOF in PBS. (pH = 7.4)

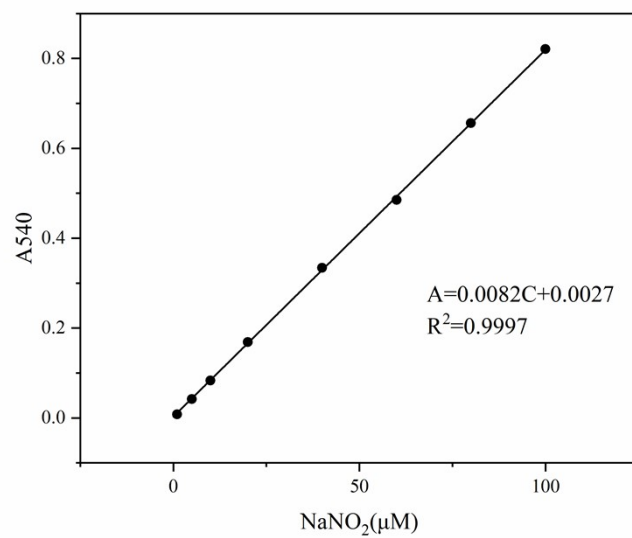

Fig. S3. Standard curve of Griess assay for NO detection.

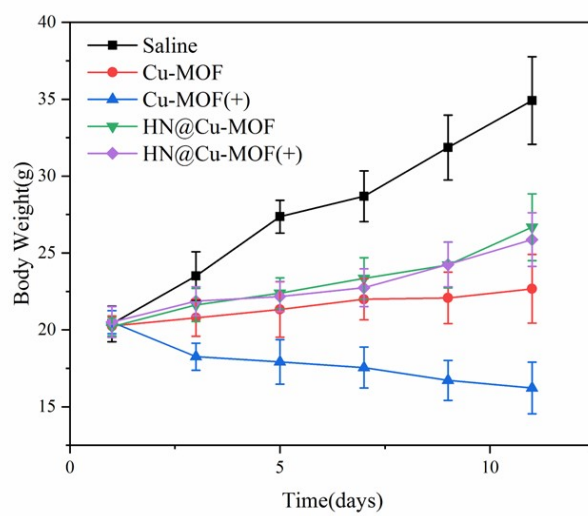

Fig. S4. The body weight variations of 4T1 bearing mice after treatment.
